# Supplementary material for: Controlled synthesis of Au–Fe3O4 hybrid hollow spheres with excellent SERS activity and catalytic properties
Source: Royal Society of Chemistry journal article supplement (doi:10.1039/c4dt00312h), 2014-01-01
Supplement: c4dt00312h1.pdf [file c4dt00312h1.pdf]

**Supporting Information:**

**Controlled synthesis of Au-Fe<sub>3</sub>O<sub>4</sub> hybrid hollow spheres with excellent SERS activity and catalytic properties**

**Qian Gao,<sup>ab</sup> Aiwu Zhao,<sup>\*ab</sup> Hongyan Guo,<sup>a</sup> Xucheng Chen,<sup>a</sup> Zibao Gan,<sup>a</sup> Wenyu Tao,<sup>a</sup> Maofeng Zhang,<sup>a</sup> Rong Wu,<sup>a</sup> and Zhenxin Li<sup>a</sup>**

*<sup>a</sup>Institute of Intelligent Machines, Chinese Academy of Sciences, Hefei, 230031, P. R. China*

*<sup>b</sup>State Key Laboratory of Transducer Technology, Chinese Academy of Sciences, Hefei, 230031, P. R. China*

\* To whom correspondence should be addressed. E-mail: awzhao@iim.ac.cn

Tel: +86-551-65593360 Fax: +86-551-65592420

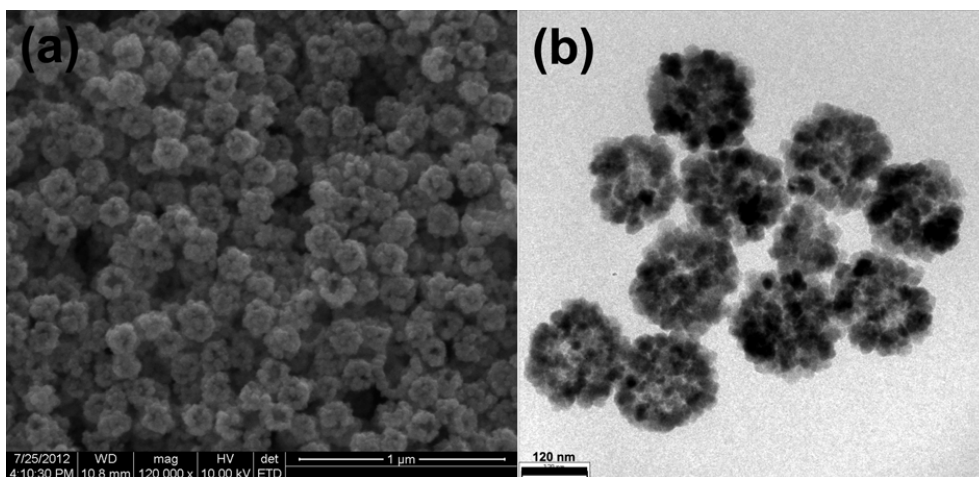

**Figure S1** (a) SEM and (b) TEM images of Au-Fe<sub>3</sub>O<sub>4</sub>-0 hybrid hollow spheres

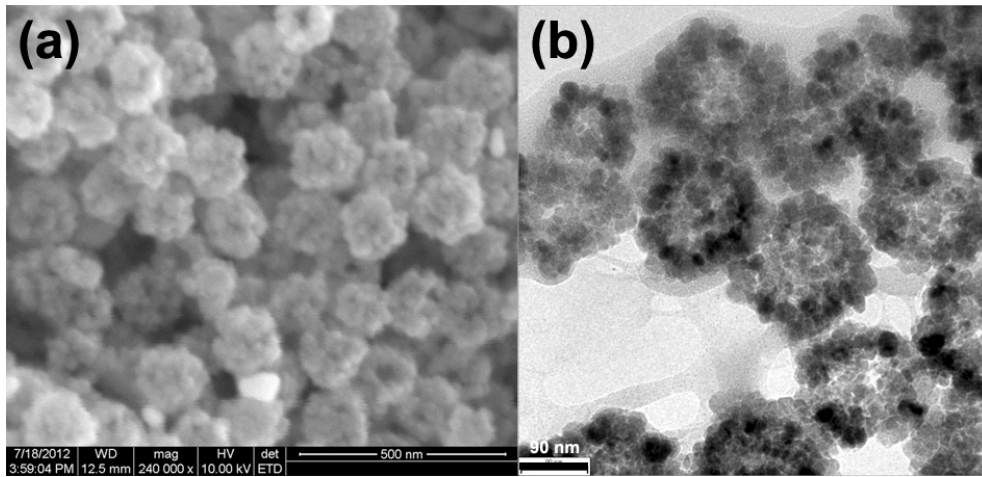

**Figure S2** (a) SEM and (b) TEM images of  $\text{Au-Fe}_3\text{O}_4\text{-0.05}$  hybrid hollow spheres

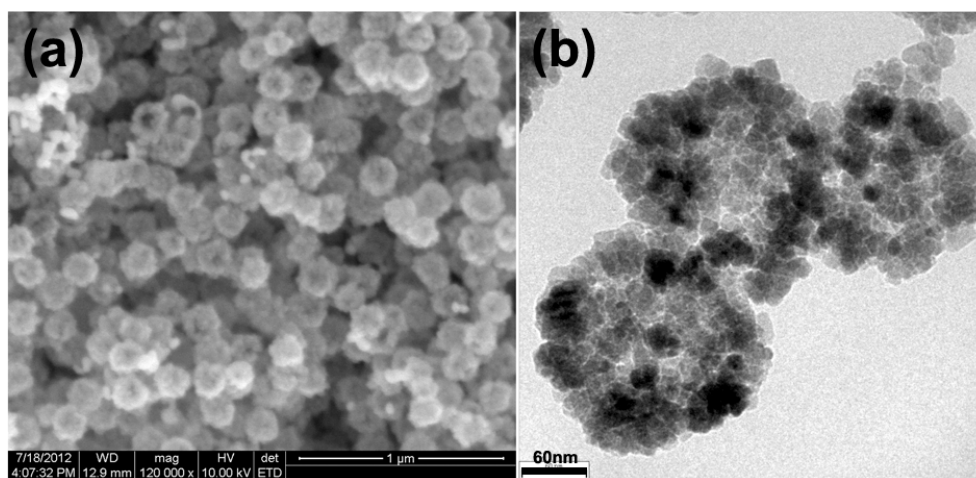

**Figure S3** (a) SEM and (b) TEM images of  $\text{Au-Fe}_3\text{O}_4\text{-0.1}$  hybrid hollow spheres

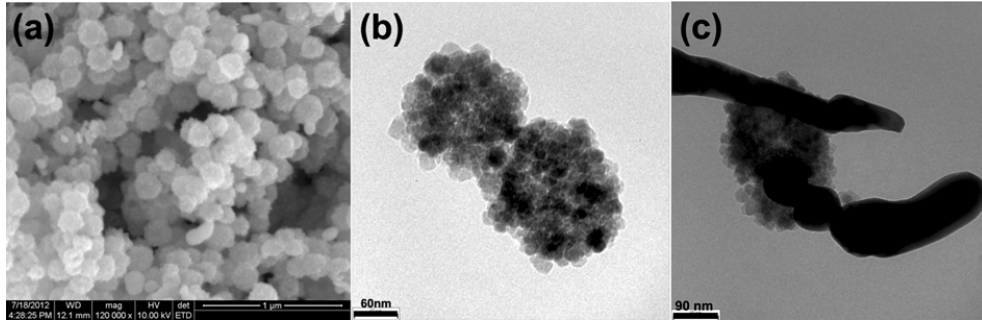

**Figure S4** (a) SEM and (b, c) TEM images of  $\text{Au-Fe}_3\text{O}_4\text{-0.5}$  hybrid hollow spheres

| Catalyst                                                               | Type                  | Initial concentration of the 4-NP | Final amount of catalyst                           | Rate constant                 | References |
|------------------------------------------------------------------------|-----------------------|-----------------------------------|----------------------------------------------------|-------------------------------|------------|
| Au-Fe <sub>3</sub> O <sub>4</sub>                                      | Hybrid hollow spheres | 5 x 10 <sup>-5</sup> M            | 0.67 mg/mL                                         | 1.76 min <sup>-1</sup>        | This work  |
| Polystyrene-Au                                                         | Supported             | 1 x 10 <sup>-4</sup> M            | 2 mg/mL                                            | 0.016-0.02 min <sup>-1</sup>  | 1          |
| Au@hm-ZrO <sub>2</sub>                                                 | Yolk-shell            | 2.83 x 10 <sup>-3</sup> M         | 0.4 mL of 6.25 x 10 <sup>-5</sup> M (Au precursor) | 0.31 min <sup>-1</sup>        | 2          |
| Fe <sub>3</sub> O <sub>4</sub> @Au                                     | Core-shell            | 6.15 x 10 <sup>-4</sup> M         | 0.77 mg/mL                                         | 100% conversion within 68 min | 3          |
| Fe <sub>3</sub> O <sub>4</sub> @SiO <sub>2</sub> -Au@mSiO <sub>2</sub> | Nanocomposites        | 2.4 x 10 <sup>-4</sup> M          | 1.43 mg/mL                                         | 0.20-0.35 min <sup>-1</sup>   | 4          |
| Au-Fe <sub>3</sub> O <sub>4</sub>                                      | Dumbell-like          | 1.81 x 10 <sup>-3</sup> M         | 0.91 mg/mL                                         | 0.63 min <sup>-1</sup>        | 5          |
| Au-Fe <sub>3</sub> O <sub>4</sub>                                      | Flower-like           | 1.81 x 10 <sup>-3</sup> M         | 0.91 mg/mL                                         | 0.38 min <sup>-1</sup>        | 5          |
| Fe <sub>3</sub> O <sub>4</sub> @P(4-VP-DVB)@Au                         | Nanocomposites        | 4.5 x 10 <sup>-4</sup> M          | 2.26 mg/mL                                         | 0.45-5.02 min <sup>-1</sup>   | 6          |

**Table S1** Comparison of pseudo-first-order rate constants for 4-NP reduction by nanomaterials containing gold nanoparticles.

## Reference

- 1 S. Panigrahi, S. Basu, S. Praharaj, S. Pande, S. Jana, A. Pal, S. K. Ghosh and T. Pal, *J. Phys. Chem. C*, 2007, **111**(12), 4596-4605.
- 2 X. Q. Huang, C. Y. Guo, L. Q. Zuo, N. F. Zheng and G. D. Stucky, *Small*, 2009, **5**(3), 361-365.
- 3 Y. P. Wu, T. Zhang, Z. H. Zheng, X. B. Ding and Y. X. Peng, *Mater. Res. Bull.*, 2010, **45**(4), 513-517.
- 4 Y. H. Deng, Y. Cai, Z. K. Sun, J. Liu, C. Liu, J. Wei, W. Li, C. Liu, Y. Wang and D. Y. Zhao, *J. Am. Chem. Soc.*, 2010, **132**(24), 8466-8473.
- 5 F. Lin and R. Doong, *J. Phys. Chem. C*, 2011, **115**(14), 6591-6598.
- 6 W. C. Guo, Q. Wang, G. Wang, M. Yang, W. J. Dong and J. Yu, *Chem. Asian J.*, 2013, **8**(6), 1160-1167.
